# Supplementary material for: Functional Characterization of PpGS2 Promoter in Response to Hormones and Low Nitrogen in Kentucky Bluegrass
Source: Research Square preprint supplement (doi:10.21203/rs.3.rs-8843861/v1), 2026-02-24
Supplement: Supplementary file 1 [file ea7950f2f158d7b46bcb4d3b.docx]

Table S1 The primers for *PpGS2* gene promoter cloning

| Primer Name | Sequence (5' to 3') |
| --- | --- |
| *pGS2*-F  *pGS2*-R  *pGS2*-F-1600  *pGS2*-F-1200  *pGS2*-F-800  *pGS2*-F-500 | GGTTTTGCCTAGACTGTATGAACCT  CTCAGCTAGCCACAGGAACTAG  GAAGAACAAACTCCATTGTTTGCT  CGAGGTTCTGTAAGTGCGC  GCAAGACGCAATTATTGCAAACT  GCCTGGGCAGGTCTGG |

Table S2 The primers for construction of *PpGS2* promoter recombinant expression vector

| Primer Name | Sequence (5' to 3') |
| --- | --- |
| *pGS2*-F  *pGS2*-R  *pGS2*-F-1600  *pGS2*-F-1200  *pGS2*-F-800  *pGS2*-F-500 | ACCTGCAGGCATGCAAGCTTGGTTTTGCCTAGACTGTATGAAC  CCTCAGATCTACCATGGCTCAGCTAGCCACAGGAACT  ACCTGCAGGCATGCAAGCTTGAAGAACAAACTCCATTGTTTG  ACCTGCAGGCATGCAAGCTTCGAGGTTCTGTAAGTGCGC  ACCTGCAGGCATGCAAGCTTGCAAGACGCAATTATTGCAAACT  ACCTGCAGGCATGCAAGCTTGCCTGGGCAGGTCTGG |

Table S3 The primers for qRT-PCR

| Primer Name | Sequence (5' to 3') |
| --- | --- |
| ACTIN-F  ACTIN-R  GUS-F  GUS-R | AAGATTGGTGGCATTGGAACTG  CTTGGCTGGGTCATCCTTGG  CGTCCTGTAGAAACCCCAACC  TTGTTTGCCTCCCTGCTGC |
